# Supplementary material
Source: PubMed Central journal article supplement (PMC4137829)
Supplement: bcp0078-0373-SD1.pdf [file bcp0078-0373-SD1.pdf]

## **Appendix S1**

### **Methods**

#### **Study subjects**

Patients who met diagnostic criteria for MDD without psychosis or mania and who had a 17-item Hamilton Depression Rating Scale (HAM-D-17) score of at least 14 were eligible for inclusion in the trial. They should not have been, or currently be on an antidepressant, antipsychotic, or mood-stabilizing medication. The patients were treated initially with either 10 mg of S-CT or 20 mg of CT. Clinical response was determined using the 16-item Quick Inventory of Depressive Symptomatology (QIDS-C16) scores 4 weeks and 8 weeks after the initiation of SSRI therapy. The drug dose could be increased to 20 mg of S-CT or 40 mg of CT at 4 weeks for patients with insufficient clinical response, and it could also be decreased or treatment could be discontinued if the patient developed intolerable side effects. Blood samples were obtained for metabolomic profiling at baseline as well as 4 and 8 weeks. The 4- and 8-week samples were also used to assay plasma drug and drug metabolite concentrations. DNA for genetic analyses was extracted from the baseline blood samples. All patients provided written informed consent and the study was reviewed and approved by the Mayo Clinic Institutional Review Board.

#### **Assay of blood drug and drug metabolite concentrations**

Plasma concentrations of S-CT, CT and their metabolites were determined using liquid chromatography tandem mass spectrometry (LC-MS/MS). A chiral LC column was used for CT and CT metabolite assays in patients treated with that drug. In brief, 500  $\mu$ L of plasma, an internal standard (dextrorphan, 20  $\mu$ L of 10  $\mu$ g/mL in methanol), 500  $\mu$ L of 1 M glycine/1M

NaOH buffer (adjusted to pH = 11.3), and 6 mL of hexane: isopropyl alcohol (95:5) was added. After mixing in a shaker for 5 min, the samples were centrifuged at 3600 rpm for 10 min at 10°C. The organic phase was evaporated to dryness using a speed vacuum, and the residue was reconstituted with 100 µL of mobile phase that consisted of acetonitrile:ammonium formate (45 mM in water, adjusted to pH = 4.0); 40:60 (v/v) from which 50 µL was injected onto the LC-MS/MS system. The LC-MS/MS analysis was performed using an API 2000 MS/MS triple quadrupole system (Applied Biosystems, Foster City, CA) equipped with a turbo ion spray coupled with a Shimadzu (Columbia, MD) HPLC system consisting of an LC-20AB pump and an SIL-20A HT autosampler, all controlled by Analyst 1.4.2 software (Applied Biosystems/MDS Sciex, Foster City, CA) in conjunction with Windows 2000 (Microsoft, Redmond, WA). S-CT and S-CT metabolites were separated using a 3 µm Luna C18(2) column (100 x 2.00 mm) (Phenomenex, Torrance, CA), a 4 µm Nova-Pak C18 guard column (Waters, Inc., MA, USA), and a mobile phase that consisted of acetonitrile:ammonium formate (45 mM in water, adjusted to pH = 4.0); 40:60 (v/v) delivered at a flow rate of 0.300 mL/min. Citalopram and metabolites were separated using a 5 µm Chirobiotic V chiral column (250 x 4.6mm) (Sigma-Aldrich, MO, USA) and a mobile phase that consisted of methanol: triethylamine: acetic acid (100: 0.04: 0.16) (v/v) delivered at 1.000 mL/min. Mass spectrometry optimization was achieved by adjustment of both compound-dependent and instrument-dependent parameters for the analytes. Quantification of R- and S-CT, R- and S-DCT, R- and S-DDCT, and the internal standard dextrorphan was performed by multiple reactions monitoring (MRM) in a positive mode using the most abundant precursor/product ion transitions (m/z: 325.3/109.00; 297.2/109.00; 311.2/109.00; and 258.25/157.10 respectively). Drugs and metabolites were quantified using the

ratio of peak area of the analyte to the peak area of the internal standard, and calibration curves were constructed using known concentrations of the analytes added to blank plasma.

### **Genotyping quality control**

Genotyping quality control assessments included concordance rates for duplicate samples and Mendelian inheritance checks performed using a CEPH parent-child trio. For each SNP, the minor allele frequency, call rate and departure from Hardy–Weinberg equilibrium were evaluated. Observed call rates, total heterozygosity and inbreeding coefficients were assessed for each subject using PLINK [1]. Sex-checks based on X-chromosome heterozygosity were performed, and measures of identity-by-descent were used to identify potentially related subjects. After this quality control process was completed, 545,115 genotyped SNPs were available for inclusion in the analysis. Genome-wide imputation was then performed using the BEAGLE software [2] and the November 23, 2010 release of the 1000 Genomes Project as the reference data.

To evaluate the possibility of population stratification, the measured SNPs were used to determine eigenvectors of the SNP correlation matrix, using the EigenStrat software [3] to determine eigenvalues for the SNP correlation matrix. Based on Tracy–Widom test p-values, 4 eigenvalues differed statistically from zero. However, none of the corresponding eigenvectors were associated with plasma drug/metabolite concentrations, so none of the eigenvectors were included in the LMM as adjusting covariates.

## Genome-wide imputation

Genome-wide imputation was performed using BEAGLE software [2] and the November 23, 2010 release of the 1000 Genomes Project as reference data. This phased reference data was oriented on the forward strand with build 37 annotation. There were 1094 subjects included in the reference data, with a total of 37,138,905 SNPs. For quality purposes, reference SNPs with minor allele frequency (MAF) values less than 0.005 were removed. This resulted in 12,067,002 un-typed SNPs for imputation. The 545,115 measured SNPs were aligned on the forward “+” strand using a combination of reference files from genotyping and the BEAGLE utility check strands.py (from Brian Browning University of Washington). Chromosomes were divided into 20 MB regions, and BEAGLE v3.3.1 was run on these 20 MB regions, plus a 1 MB buffer region to the right and left of the main region because ends are generally poorly imputed. The reference data was phased, and the observed genotype data was un-phased. SNPs with a dose  $R^2 < 0.3$  were removed from the analyses [4], as well SNPs with a MAF  $< 0.01$ , resulting in 7,537,437 SNPs (observed or imputed) that were used in the GWA analyses.

## Database mining and informatics analyses

Functional annotation of SNPs was performed with the Ensembl Genome Browser (<http://useast.ensembl.org>) and SNPnexus, a web-based annotation tool (<http://snp-nexus.org>) [5] as well as GeneMANIA (<http://www.genemania.org>) for genomic and proteomic data. These tools were applied to identify function and relationship of genes observed from the top GWAS associations [6]. Regional association results and LD values were plotted using LocusZoom (<http://csg.sph.umich.edu/locuszoom>) [7] and SNAP (SNP Annotation and Proxy Search from the Broad Institute, <http://www.broadinstitute.org/mpg/snap>), respectively. The Mouse Phenome

Database at the Jackson Laboratory (<http://phenome.jax.org>) was used to investigate the function of mouse homologue genes, including *TRIML1* that were identified during our GWA analyses.

## References

1. Purcell S, Neale B, Todd-Brown K, Thomas L, Ferreira MA, Bender D, Maller J, Sklar P, de Bakker PI, Daly MJ, Sham PC. PLINK: a tool set for whole-genome association and population-based linkage analyses. *Am J Hum Genet* 2007; 81: 559-75.
2. Browning BL, Browning SR. A unified approach to genotype imputation and haplotype-phase inference for large data sets of trios and unrelated individuals. *Am J Hum Genet* 2009; 84: 210-23.
3. Price AL, Patterson NJ, Plenge RM, Weinblatt ME, Shadick NA, Reich D. Principal components analysis corrects for stratification in genome-wide association studies. *Nat Genet* 2006; 38: 904-9.
4. de Bakker PI, Ferreira MA, Jia X, Neale BM, Raychaudhuri S, Voight BF. Practical aspects of imputation-driven meta-analysis of genome-wide association studies. *Hum Mol Genet* 2008; 17: R122-8.
5. Dayem Ullah AZ, Lemoine NR, Chelala C. SNPnexus: a web server for functional annotation of novel and publicly known genetic variants (2012 update). *Nucleic Acids Res* 2012; 40: W65-70.
6. Warde-Farley D, Donaldson SL, Comes O, Zuberi K, Badrawi R, Chao P, Franz M, Grouios C, Kazi F, Lopes CT, Maitland A, Mostafavi S, Montojo J, Shao Q, Wright G, Bader GD, Morris Q. The GeneMANIA prediction server: biological network integration for gene prioritization and predicting gene function. *Nucleic Acids Res* 2010; 38: W214-20.
7. Pruim RJ, Welch RP, Sanna S, Teslovich TM, Chines PS, Gliedt TP, Boehnke M, Abecasis GR, Willer CJ. LocusZoom: regional visualization of genome-wide association scan results. *Bioinformatics* 2010; 26: 2336-7.

**Appendix Table S1. Linear mixed model covariate p-values. A p-value of 0.05 was considered significant.**

| pheno                        | dose     | age      | genderM  | Week 8   |
|------------------------------|----------|----------|----------|----------|
| log(S.Cital)                 | 1.60E-14 | 1.35E-14 | 7.38E-04 | 2.34E-01 |
| log(S.Desmethyl.Cital)       | 0.00E+00 | 9.52E-04 | 4.29E-06 | 1.70E-01 |
| log(S.Didesmethyl.Cital+.01) | 6.16E-04 | 1.02E-01 | 5.98E-01 | 9.40E-01 |
| log10(ratio.S.Des.Cit)       | 1.49E-01 | 3.22E-08 | 7.16E-01 | 9.56E-01 |
| log10(ratio.S.Dides.Des)     | 3.73E-01 | 7.02E-01 | 2.74E-01 | 4.69E-01 |

**Appendix Table S2. Top 10 associations for the GWAS of S-desmethylcitalopram (S-DCT) concentrations.**

| <b>S-Desmethylcitalopram (S-DCT) concentration</b>                  |                |                 |            |            |           |              |                               |                         |
|---------------------------------------------------------------------|----------------|-----------------|------------|------------|-----------|--------------|-------------------------------|-------------------------|
| <b>SNP</b>                                                          | <b>p-value</b> | <b>genotype</b> | <b>MAF</b> | <b>CHR</b> | <b>BP</b> | <b>gene</b>  | <b>gene location/function</b> | <b>distance to gene</b> |
| rs9747992*                                                          | 1.55E-07       | A/G             | 0.086      | 17         | 77804840  | CBX4         | 3'-downstream                 | 8388                    |
| rs2059865                                                           | 2.58E-07       | A/T             | 0.235      | 5          | 31766433  | PDZD2        | intronic                      | 0                       |
| rs34884728                                                          | 4.33E-07       | A/G             | 0.272      | 5          | 31781647  | PDZD2        | intronic                      | 0                       |
| rs7707966*                                                          | 5.10E-07       | A/G             | 0.276      | 5          | 31789679  | PDZD2        | intronic                      | 0                       |
| rs10461903                                                          | 5.99E-07       | C/T             | 0.325      | 5          | 31766703  | PDZD2        | intronic                      | 0                       |
| rs9747031                                                           | 6.13E-07       | C/G             | 0.105      | 17         | 77804936  | CBX4         | 3'-downstream                 | 8292                    |
| rs117020818                                                         | 6.80E-07       | A/G             | 0.046      | 11         | 13129163  | CTC-497E21.5 | intronic                      | 0                       |
| rs79847705                                                          | 7.07E-07       | A/G             | 0.047      | 11         | 13134780  | CTC-497E21.5 | intronic                      | 0                       |
| rs13182171                                                          | 8.02E-07       | C/A             | 0.196      | 5          | 31812179  | PDZD2        | intronic                      | 0                       |
| rs34301697                                                          | 8.42E-07       | G/A             | 0.193      | 5          | 31813639  | PDZD2        | intronic                      | 0                       |
| <b>CYP2C19-adjusted S-desmethylcitalopram (S-DCT) concentration</b> |                |                 |            |            |           |              |                               |                         |
| <b>SNP</b>                                                          | <b>p.snp</b>   | <b>genotype</b> | <b>MAF</b> | <b>CHR</b> | <b>BP</b> | <b>gene</b>  | <b>gene location/function</b> | <b>distance to gene</b> |
| rs9747992*                                                          | 1.16E-07       | A/G             | 0.086      | 17         | 77804840  | CBX4         | 3'-downstream                 | 8388                    |
| rs9747031                                                           | 4.32E-07       | C/G             | 0.105      | 17         | 77804936  | CBX4         | 3'-downstream                 | 8292                    |
| rs2059865                                                           | 5.09E-07       | A/T             | 0.235      | 5          | 31766433  | PDZD2        | intronic                      | 0                       |
| rs77724872                                                          | 6.84E-07       | T/C             | 0.047      | 12         | 104754500 | EID3         | 3'-downstream intragenic      | 55520                   |
| rs117020818                                                         | 7.15E-07       | A/G             | 0.046      | 11         | 13129163  | CTC-497E21.5 | 5'-downstream intragenic      | 96516                   |
| rs8102150                                                           | 7.18E-07       | G/C             | 0.028      | 19         | 50230327  | CTB-33G10.1  | non-coding /CpG island 43     | 0                       |
| rs3810263                                                           | 7.21E-07       | G/A             | 0.027      | 19         | 50223147  | CTB-33G10.1  | non-coding /CpG island 43     | 0                       |
| rs79847705                                                          | 7.44E-07       | A/G             | 0.047      | 11         | 13134780  | CTC-497E21.5 | 5'-downstream intragenic      | 102133                  |
| rs3810264                                                           | 8.22E-07       | G/A             | 0.028      | 19         | 50223230  | CTB-33G10.1  | non-coding /CpG island 43     | 0                       |
| rs3810265                                                           | 8.39E-07       | A/G             | 0.028      | 19         | 50223266  | CTB-33G10.1  | non-coding /CpG island 43     | 0                       |

\* indicates genotyped SNPs.

**Appendix Table S3.** Top 10 associations for the GWAS of S-didesmethylcitalopram (S-DDCT) concentration and S-didesmethylcitalopram/S-desmethylcitalopram (S-DCT/S-CT) ratio. Two *CYP2D6* nonsynonymous cSNPs are boxed.

| S-Didesmethylcitalopram (S-DDCT) concentration |            |                        |          |       |     |          |                             |                                   |                                |
|------------------------------------------------|------------|------------------------|----------|-------|-----|----------|-----------------------------|-----------------------------------|--------------------------------|
| SNP                                            | p-value    |                        | genotype | MAF   | CHR | BP       | gene                        | gene location/function            | Distance to <i>CYP2D6</i> , bp |
|                                                | for S-CT** | for S-DDCT/<br>S-DCT** |          |       |     |          |                             |                                   |                                |
| c22.42519657.b37p0                             | 2.00E-16   | 7.99E-16               | A/C      | 0.198 | 22  | 42519657 | <i>LOC100132273/CYP2D6</i>  | non-coding intronic/3'-downstream | 2844                           |
| c22.42533645.b37p0                             | 2.00E-16   | 7.99E-16               | T/C      | 0.332 | 22  | 42533645 | <i>CYP2D6</i>               | 5'-upstream                       | 6737                           |
| rs1001586*                                     | 2.00E-16   | 7.99E-16               | A/C      | 0.198 | 22  | 42670293 | <i>LOC388906/CYP2D6</i>     | non-coding/5'-upstream intragenic | 143385                         |
| rs1001587*                                     | 2.00E-16   | 7.99E-16               | A/G      | 0.201 | 22  | 42670111 | <i>LOC388906/CYP2D6</i>     | non-coding/5'-upstream intragenic | 143203                         |
| rs1033459                                      | 2.00E-16   | 7.99E-16               | G/A      | 0.198 | 22  | 42619067 | <i>CYP2D6</i>               | 5'-upstream intragenic            | 92159                          |
| rs1033460                                      | 2.00E-16   | 7.99E-16               | G/A      | 0.198 | 22  | 42619308 | <i>CYP2D6</i>               | 5'-upstream intragenic            | 92400                          |
| rs1058172                                      | 2.00E-16   | 7.99E-16               | T/C      | 0.155 | 22  | 42523528 | <i>CYP2D6</i>               | coding, nonsyn, R365/314H         | 0                              |
| rs1058174                                      | 2.00E-16   | 7.99E-16               | A/G      | 0.151 | 22  | 42536263 | <i>CYP2D6</i>               | 5'-upstream                       | 9355                           |
| rs1062753*                                     | 2.00E-16   | 7.99E-16               | A/G      | 0.307 | 22  | 42392811 | <i>SEPT/CYP2D6</i>          | Intronic/5'-upstream intragenic   | 12960                          |
| rs1065852                                      | 2.00E-16   | 7.99E-16               | A/G      | 0.215 | 22  | 42526694 | <i>CYP2D6</i> *4,*10 and*14 | coding, nonsyn, P34S              | 0                              |

\* indicates genotyped SNPs.

\* p-values remain the same for CYP2C19-adjusted S-DDCT level



### Appendix Figure Legends

**Figure S1.** GWAS analysis results after 1000 Genomes imputation for ratios of S-didesmethylcitalopram (S-DDCT) plasma concentration over its demethylated precursor, S-desmethylcitalopram (S-DCT) (A) Manhattan plot for S-DDCT/S-DCT plasma concentration ratio. (B) Manhattan plot for S-DDCT/S-DCT plasma concentration ratio, adjusted for the effect of *CYP2C19* functional alleles. Red dots represent SNPs with p-values  $\leq 10^{-5}$  and blue dots represent SNPs with p-values  $\leq 10^{-4}$ .

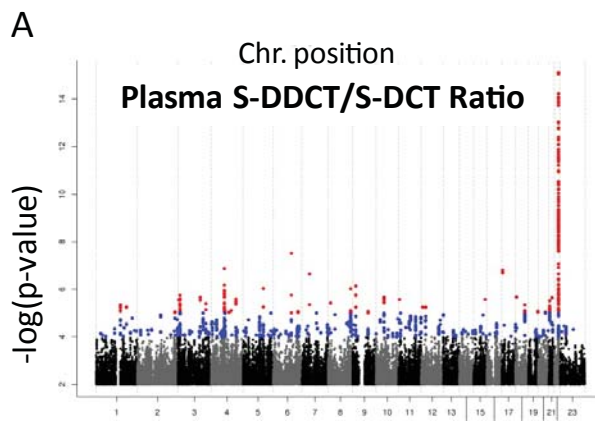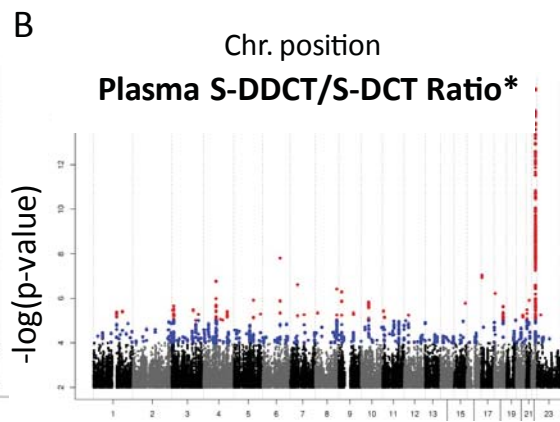

\* adjusted for the effect of *CYP2C19* functional alleles

Figure S1
